# Supplementary material for: Phytochemical, Antioxidant Activity, and Toxicity of Wild Medicinal Plant of Melitotus albus Extracts, In Vitro and In Silico Approaches
Source: PubMed Central journal article supplement — ACS Omega. 2024 Feb 9;9(8):9236–46. doi: 10.1021/acsomega.3c08314 (PMC10905593; doi:10.1021/acsomega.3c08314), 2024-02-09
Supplement: ao3c08314_si_001.pdf [file ao3c08314_si_001.pdf]

## **Phytochemical, Antioxidant Activity and Toxicity of Wild Medicinal Plant of *Melilotus Albus* Extracts, *In-vitro* and *In-Silico* Approaches**

Imad Ed-Dahmani<sup>1,\*</sup>, Mohamed El fadili<sup>2</sup>, Fahd Kandsi<sup>3</sup>, Raffaele Conte<sup>4</sup>, Yassine El Atki<sup>5</sup>, Mohammed Kara<sup>6,\*</sup>, Amine Assouguem<sup>7</sup>, Hanane Touijer<sup>8</sup>, Aziza Lfitat<sup>1</sup>, Ghizlane Nouioura<sup>8</sup>, Meryem Slighoua<sup>9</sup>, Jameel H Al-Tamimi<sup>10</sup>, Mustapha Taleb<sup>1</sup> and Abdelfattah Abdellaoui<sup>1</sup>

- <sup>1</sup> Laboratory of Engineering, Electrochemistry, Modelling and Environment, Sidi Mohamed Ben Abdellah University, Faculty of Sciences Fès, Morocco; [imad.edhmani@gmail.com](mailto:imad.edhmani@gmail.com); [Aziza.Lfitat@sumba.ac.ma](mailto:Aziza.Lfitat@sumba.ac.ma) ; [Mustapha.taleb@usmba.ac.ma](mailto:Mustapha.taleb@usmba.ac.ma); [Abdelfattah.Abdellaoui@usmba.ac.ma](mailto:Abdelfattah.Abdellaoui@usmba.ac.ma) ;
  - <sup>2</sup> LIMAS Laboratory, Faculty of Sciences Dhar El Mehraz, Sidi Mohammed Ben Abdellah University, BP 1796 Atlas, Fez 30000, Morocco; [mohamed.elfadili@usmba.ac.ma](mailto:mohamed.elfadili@usmba.ac.ma) ;
  - <sup>3</sup> Laboratory of Bioresources, Biotechnology, Ethnopharmacology and Health, Faculty of Sciences, Mohammed First University, B.P. 717, Oujda 60000, Morocco; [kandsi.fahd@ump.ac.ma](mailto:kandsi.fahd@ump.ac.ma)
  - <sup>4</sup> Research Institute on Terrestrial Ecosystems (IRET)-CNR, 80131 Naples, Italy; [raffaele.conte86@tiscali.it](mailto:raffaele.conte86@tiscali.it)
  - <sup>5</sup> High Institute of Nursing Professions and Health Techniques Errachidia, Morocco; [Yassine.ElAtki@usmba.ac.ma](mailto:Yassine.ElAtki@usmba.ac.ma) ;
  - <sup>6</sup> Laboratory of Biotechnology, Conservation and Valorisation of Natural Resources (LBCVNR), Faculty of Sciences Dhar El Mahraz, Sidi Mohamed Ben Abdallah University, BP 1796 Atlas, Fez 30000, Morocco; [mohammed.kara@usmba.ac.ma](mailto:mohammed.kara@usmba.ac.ma);
  - <sup>7</sup> Laboratory of Functional Ecology and Environment, Faculty of Sciences and Technology, Sidi Mohamed Ben Abdellah University, PO. box 2202 Imouzzer street, Fez 30000, Morocco; [assougam@gmail.com](mailto:assougam@gmail.com);
  - <sup>8</sup> Laboratory of Biotechnology, Environment, Agro-Food, and Health (LBEAS), Faculty of Sciences, University, Sidi-Mohamed-Ben-Abdellah (USMBA), Fez 30050, Morocco; [hanane.touijer@usmba.ac.ma](mailto:hanane.touijer@usmba.ac.ma); [ghizlane.nouioura@usmba.ac.ma](mailto:ghizlane.nouioura@usmba.ac.ma);
  - <sup>9</sup> Laboratory of Natural Substances, Pharmacology, Environment, Modeling, Health and Quality of Life (SNAMOPEQ), Faculty of Sciences Dhar El-Mehraz, Sidi Mohamed Ben Abdellah University, Fez 30 000, Morocco; [meryem.slighoua@usmba.ac.ma](mailto:meryem.slighoua@usmba.ac.ma);
  - <sup>10</sup> Department of Zoology, College of Science, King Saud University, P.O. Box 2455, Riyadh 11451, Kingdom of Saudi Arabia; [Jtamimi@ksu.edu.sa](mailto:Jtamimi@ksu.edu.sa)
- \* Correspondence: [imad.edhmani@gmail.com](mailto:imad.edhmani@gmail.com); [mohammed.kara@usmba.ac.ma](mailto:mohammed.kara@usmba.ac.ma)

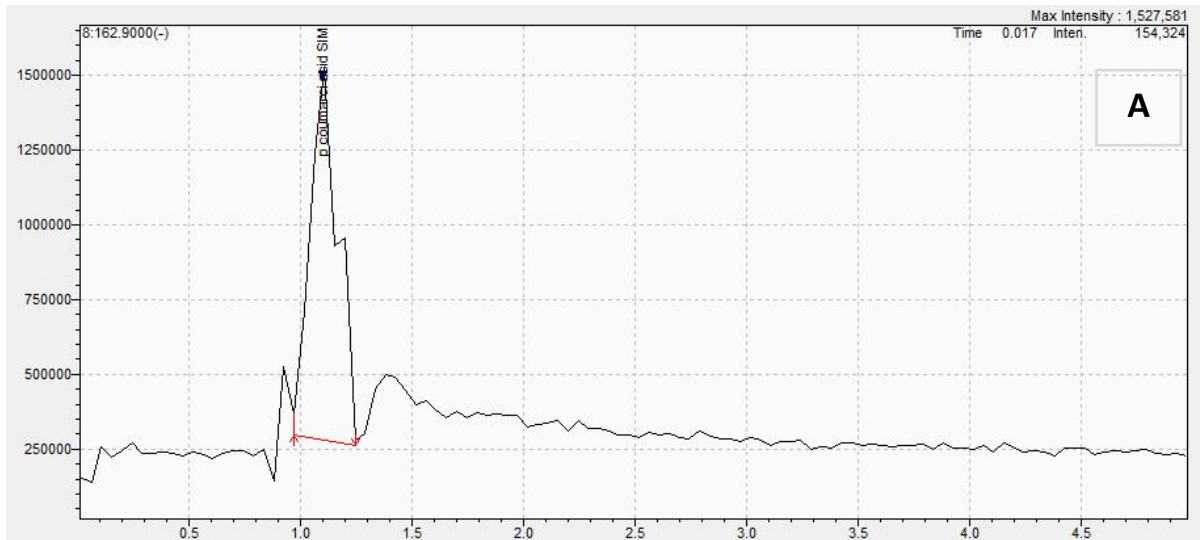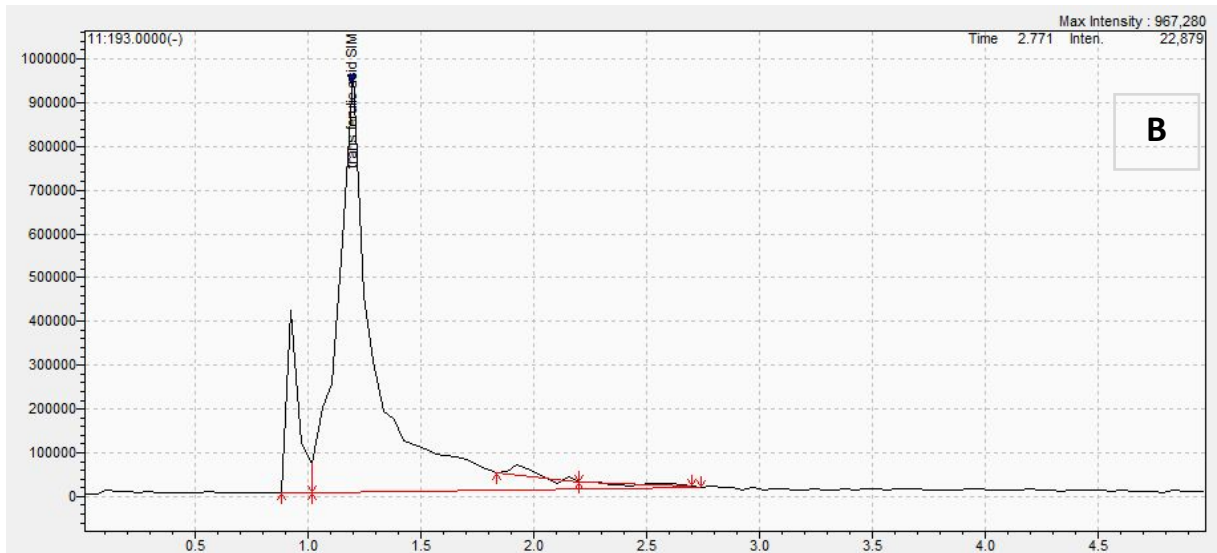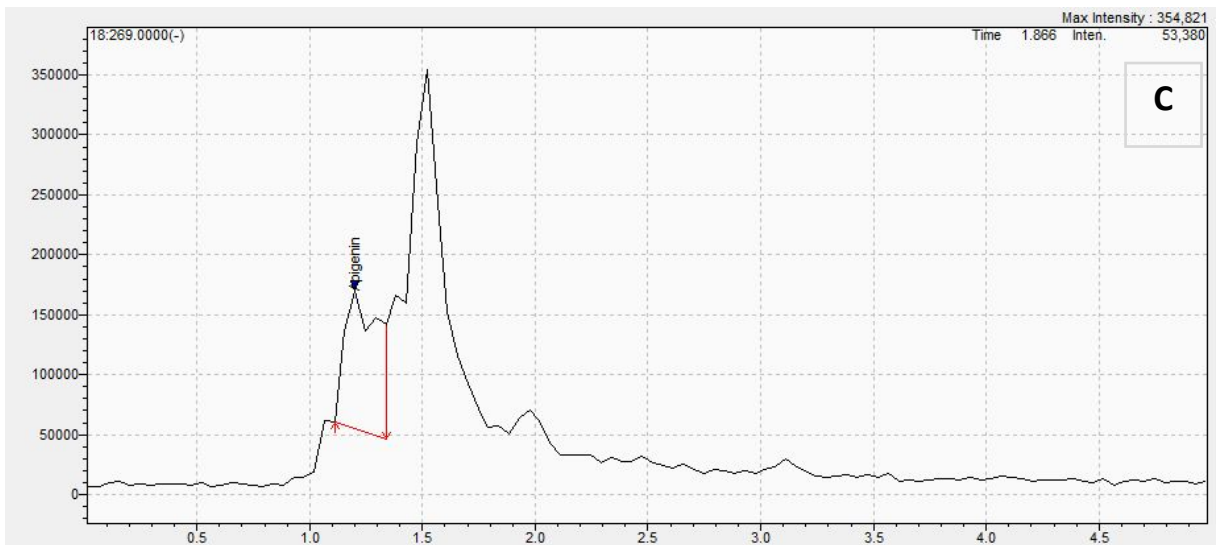

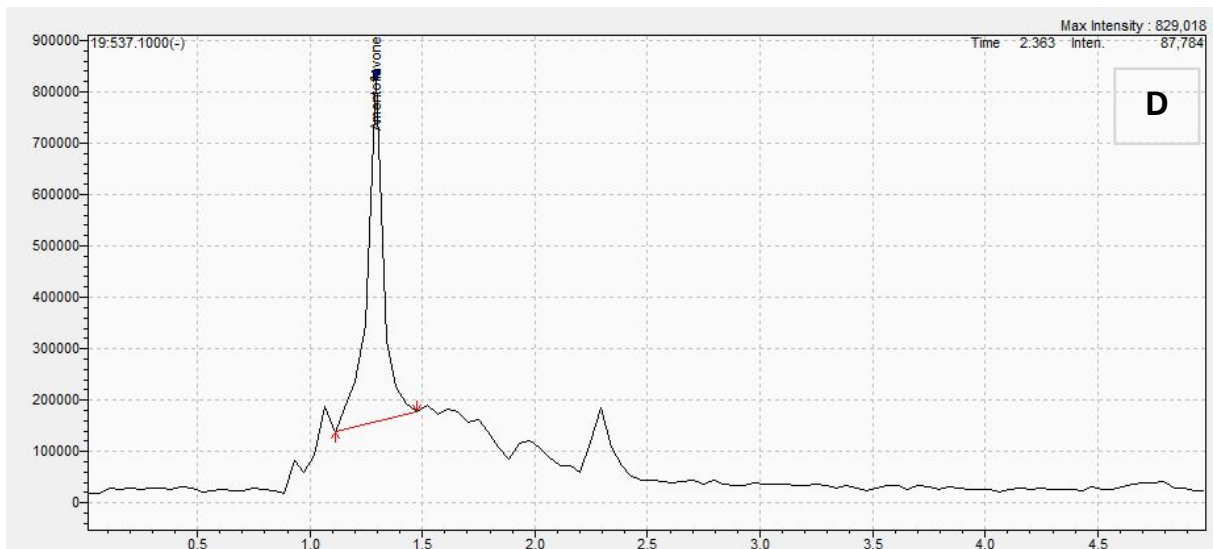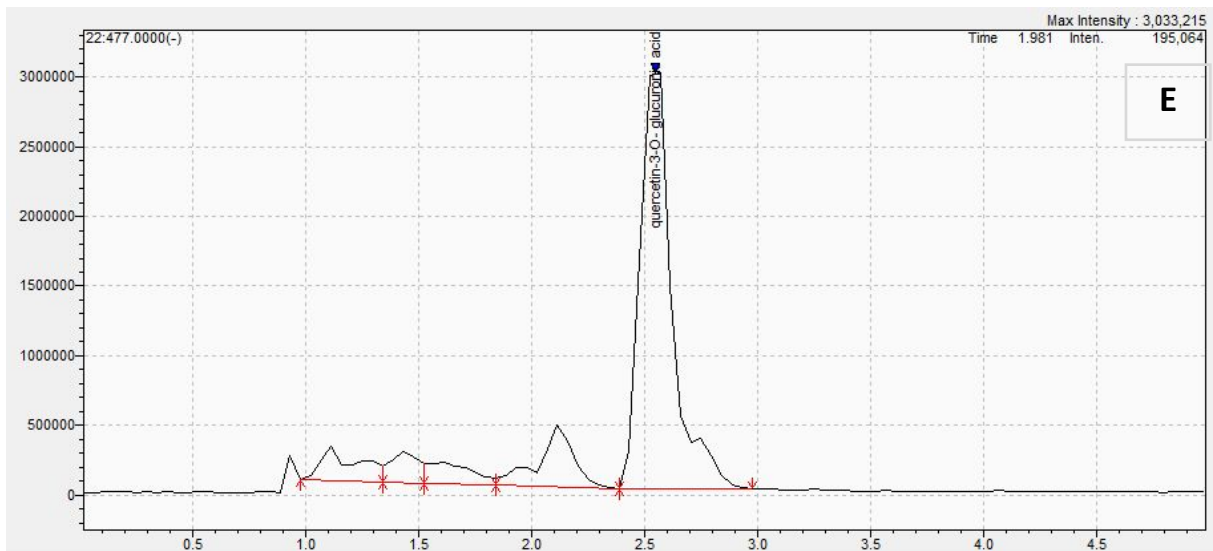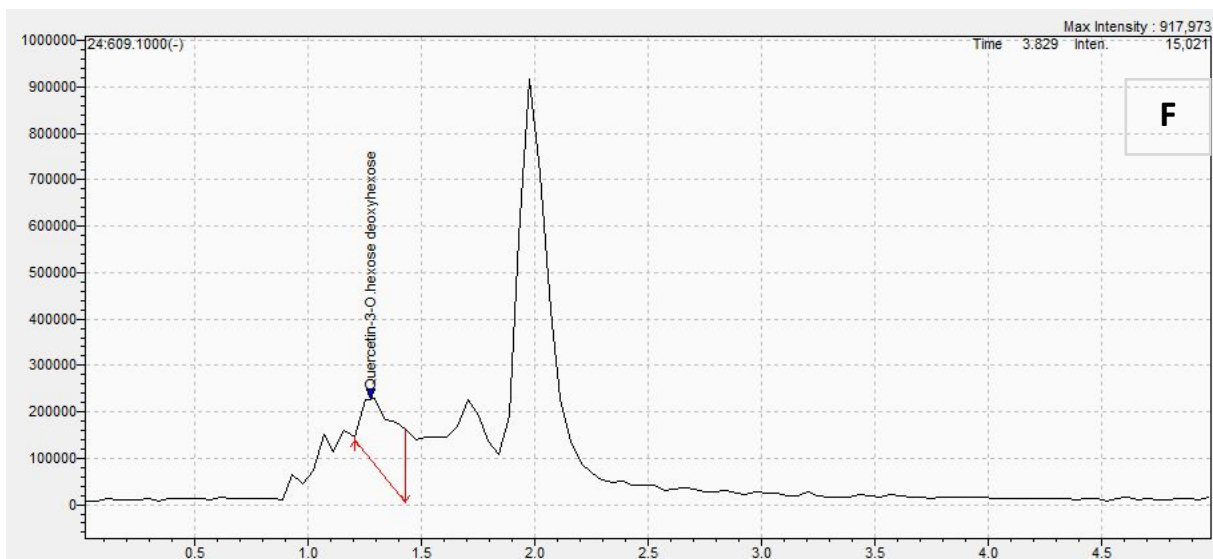

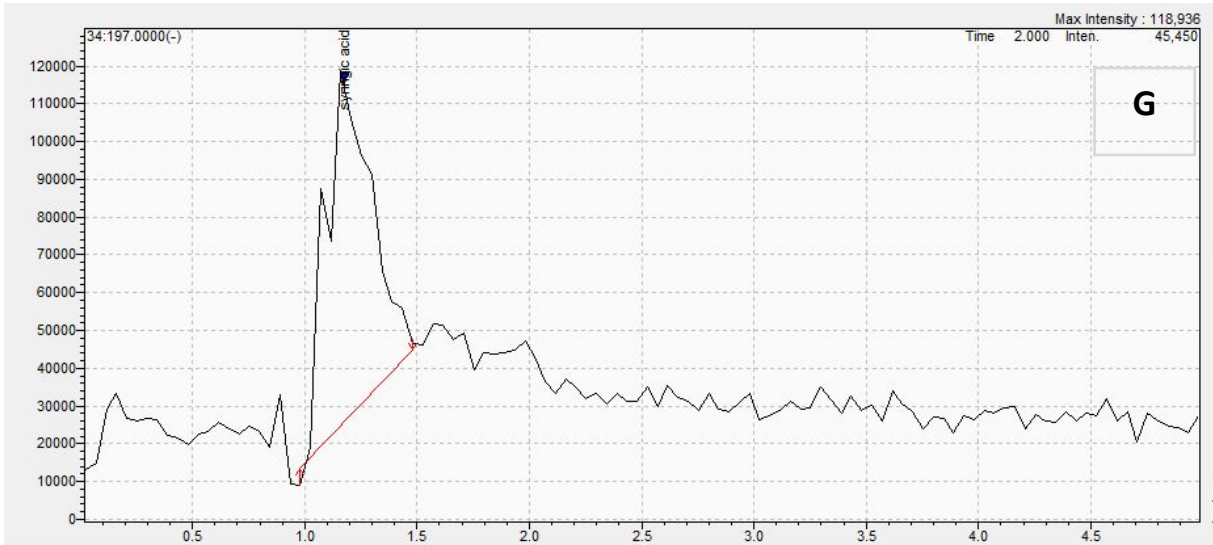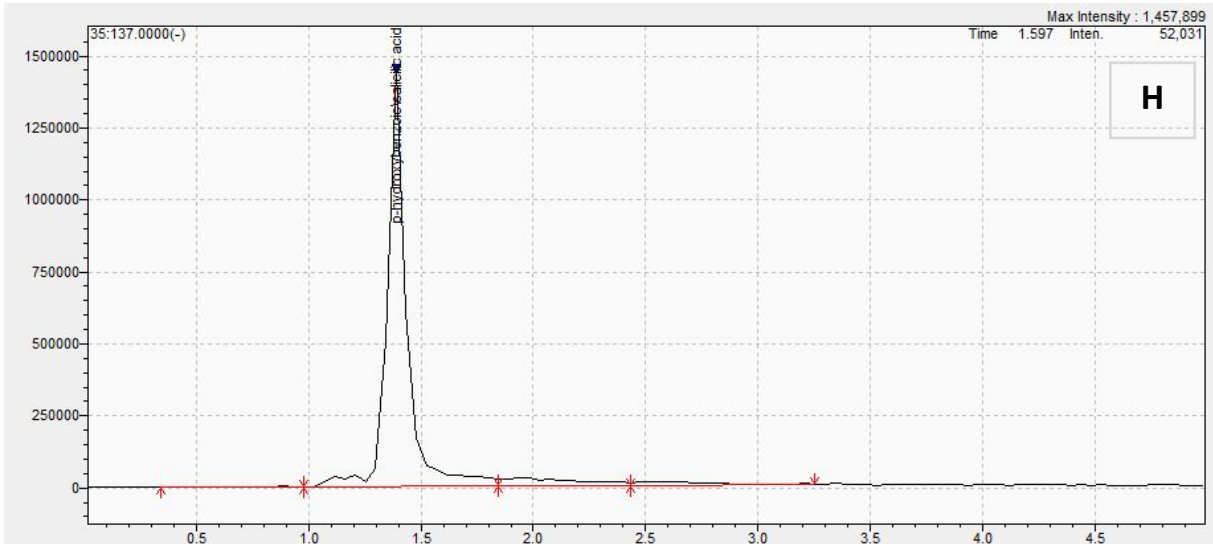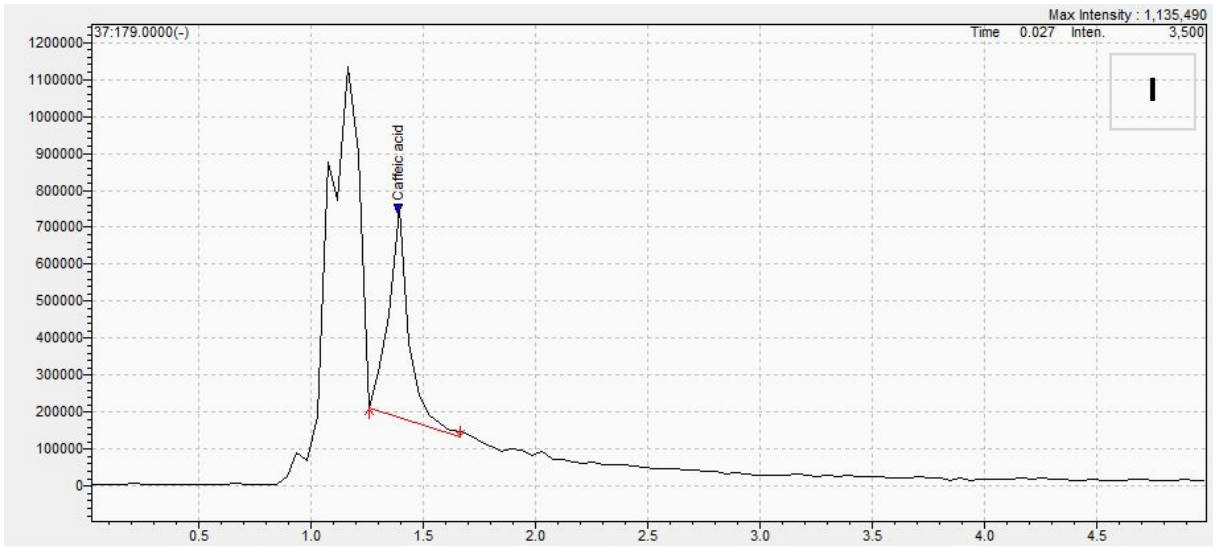

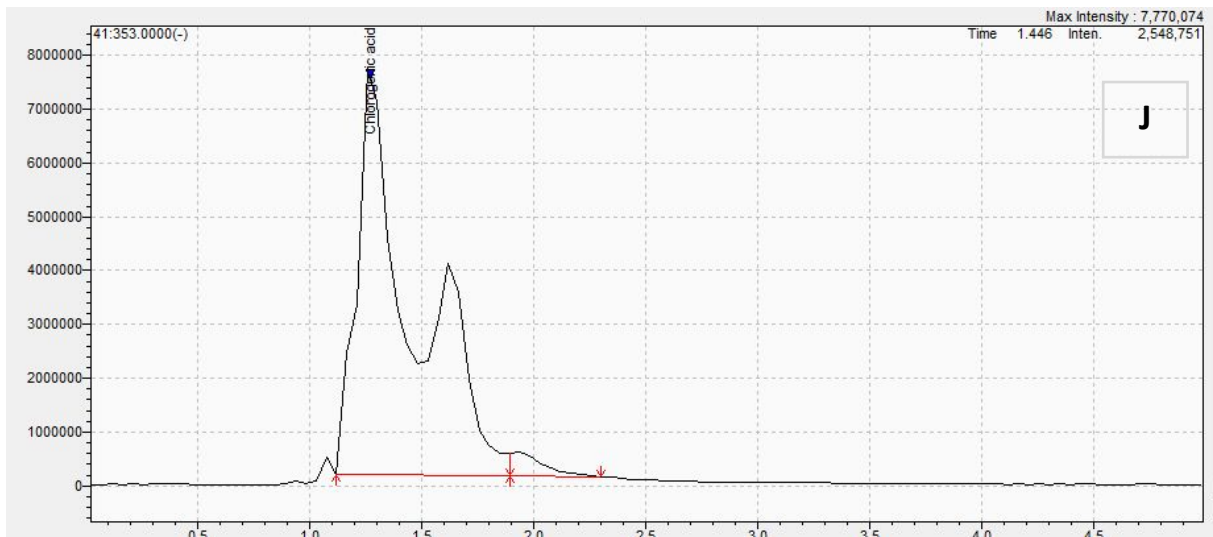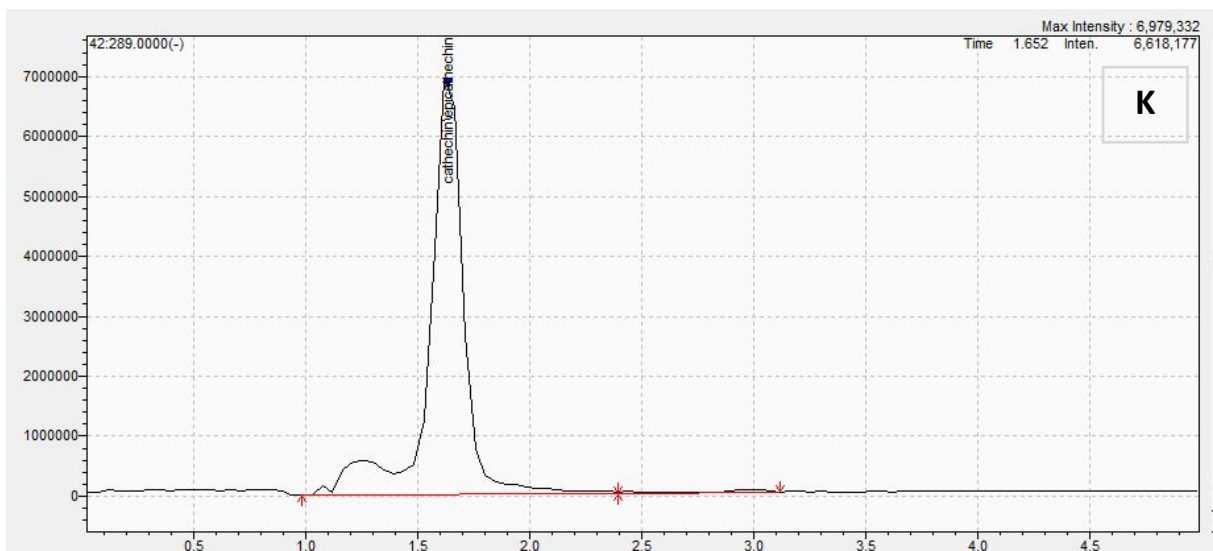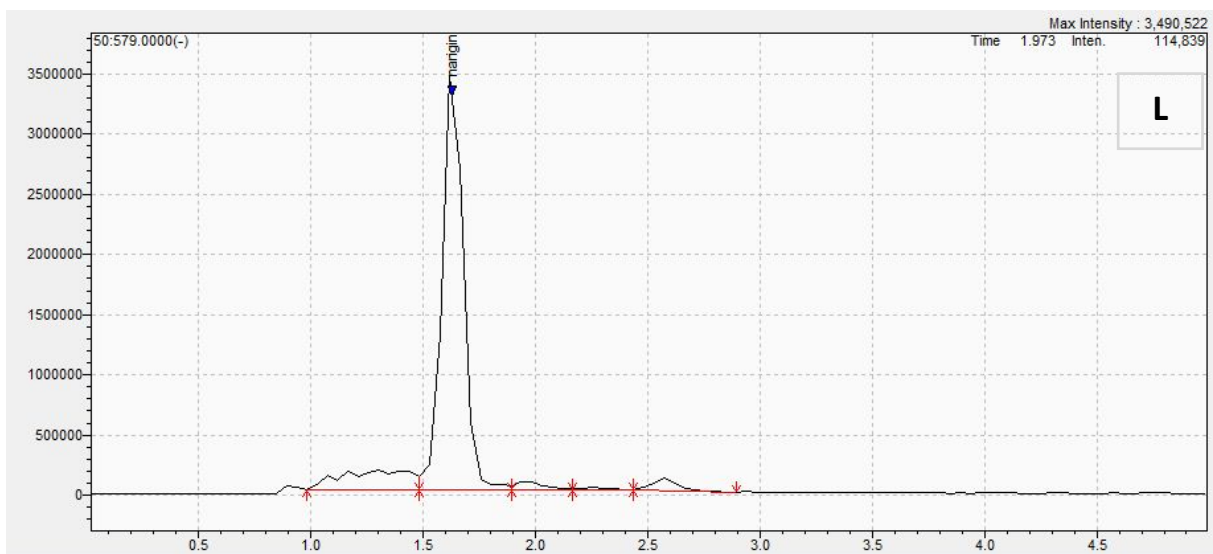

**Figure S1:** LC-MS/MS analysis graphs of the *M. albus* extract. A. p-coumaric acid; B. trans ferulic acid; C. Apigenin; D. Amentoflavone; E. quercetin-3-O- glucuronic acid; F. Quercetin-

3-O. hexose deoxyhexose; G. syringic acid; H. p-hydroxybenzoic\salicylic acid; I. Caffeic acid; J. Chlorogenic acid; K. catechin\epicatechin; L. Narigin.

**Table S1:** The prediction of physicochemical properties of twelve chemical compounds based on the five rules of Lipinski.

| Compounds<br>Numbers | Physico-chemical properties    |                              |                            |                                     |                    |       | Lipinski<br>rules       |
|----------------------|--------------------------------|------------------------------|----------------------------|-------------------------------------|--------------------|-------|-------------------------|
|                      | Molecular<br>weight<br>(g/mol) | Molar<br>Refractive<br>Index | Log<br>(Ethanol/wa<br>ter) | P<br>Hydrogen<br>Bonds<br>Acceptors | Hydrogen<br>Donors | Bonds | Categorical<br>(Yes/No) |
| <b>Rule</b>          | $\leq 500$                     | $40 \leq MR \leq 130$        | $< 5$                      | $\leq 10$                           | $< 5$              |       |                         |
| <b>C1</b>            | 164.16                         | 45.13                        | 0.95                       | 3                                   | 2                  |       | Yes                     |
| <b>C2</b>            | 194.18                         | 51.63                        | 1.62                       | 4                                   | 2                  |       | Yes                     |
| <b>C3</b>            | 270.24                         | 73.99                        | 1.89                       | 5                                   | 3                  |       | Yes                     |
| <b>C4</b>            | <b><u>538.46</u></b>           | <b><u>146.97</u></b>         | 3.06                       | 10                                  | <b><u>6</u></b>    |       | <b><u>No</u></b>        |
| <b>C5</b>            | 478.36                         | 111.59                       | 0.50                       | <b><u>13</u></b>                    | <b><u>8</u></b>    |       | <b><u>No</u></b>        |
| <b>C6</b>            | <b><u>594.52</u></b>           | <b><u>140.22</u></b>         | 2.60                       | <b><u>15</u></b>                    | <b><u>9</u></b>    |       | <b><u>No</u></b>        |
| <b>C7</b>            | 198.17                         | 48.41                        | 1.54                       | 5                                   | 2                  |       | Yes                     |
| <b>C8</b>            | 138.12                         | 35.42                        | 1.13                       | 3                                   | 2                  |       | Yes                     |
| <b>C9</b>            | 180.16                         | 47.16                        | 0.97                       | 4                                   | 3                  |       | Yes                     |
| <b>C10</b>           | 354.31                         | 83.50                        | 0.87                       | 9                                   | 6                  |       | Yes                     |
| <b>C11</b>           | 290.27                         | 74.33                        | 1.47                       | 6                                   | 5                  |       | Yes                     |
| <b>C12</b>           | <b><u>580.53</u></b>           | <b><u>134.91</u></b>         | 2.07                       | <b><u>14</u></b>                    | <b><u>8</u></b>    |       | <b><u>No</u></b>        |

**Table S2:** The prediction of ADMET in-silico pharmacokinetic properties of twelve chemical compounds.

| Compound<br>Numbers  | Absorption                          |                     | Distribution         |             | Metabolism |     |           |     |                            |                    | Excretion        |                   |
|----------------------|-------------------------------------|---------------------|----------------------|-------------|------------|-----|-----------|-----|----------------------------|--------------------|------------------|-------------------|
|                      | Intestinal<br>Absorption<br>(human) | BBB<br>permeability | CNS<br>permeability  | Substrate   |            |     | Inhibitor |     |                            | Total<br>Clearance | AMES<br>toxicity |                   |
|                      |                                     |                     |                      | Cytochromes |            |     |           |     |                            |                    |                  |                   |
|                      |                                     |                     |                      | 2D6         | 3A4        | 1A2 | 2C19      | 2C9 | 2D6                        |                    |                  | 3A4               |
| Numeric<br>Absorbed) | (%<br>(Log BB)                      | Numeric<br>(Log PS) | Categorical (Yes/No) |             |            |     |           |     | Numeric (Log<br>ml/min/kg) |                    |                  |                   |
| <b>C1</b>            | 91.673                              | -0.239              | -2.413               | No          | No         | No  | No        | No  | No                         | No                 | 0.696            | No                |
| <b>C2</b>            | 95.598                              | -0.25               | -2.569               | No          | No         | No  | No        | No  | No                         | No                 | 0.641            | No                |
| <b>C3</b>            | 91.622                              | -0.968              | -2.176               | No          | No         | Yes | Yes       | Yes | No                         | Yes                | 0.616            | No                |
| <b>C4</b>            | 83.84                               | -2.063              | -3.599               | No          | No         | No  | No        | No  | No                         | No                 | 0.807            | No                |
| <b>C5</b>            | 28.49                               | -2.241              | -5.584               | No          | No         | No  | No        | No  | No                         | No                 | 0.9              | <b><u>Yes</u></b> |
| <b>C6</b>            | 40.45                               | -2.13               | -5.594               | No          | No         | No  | No        | No  | No                         | No                 | -0.151           | <b><u>Yes</u></b> |
| <b>C7</b>            | 82.412                              | 0.067               | -2.963               | No          | No         | No  | No        | No  | No                         | No                 | 0.663            | No                |
| <b>C8</b>            | 77.71                               | -0.313              | -2.909               | No          | No         | No  | No        | No  | No                         | No                 | 0.655            | No                |
| <b>C9</b>            | 59.008                              | -0.816              | -3.361               | No          | No         | No  | No        | No  | No                         | No                 | 0.558            | <b><u>Yes</u></b> |
| <b>C10</b>           | 17.157                              | -1.443              | -4.034               | No          | No         | No  | No        | No  | No                         | No                 | 0.373            | No                |
| <b>C11</b>           | 72.519                              | -1.066              | -3.395               | No          | No         | No  | No        | No  | No                         | No                 | 0.266            | <b><u>Yes</u></b> |
| <b>C12</b>           | 22.117                              | -1.791              | -5.058               | No          | No         | No  | No        | No  | No                         | No                 | 0.496            | <b><u>Yes</u></b> |
